# Supplementary material
Source: PubMed Central journal article supplement (PMC3618350)
Supplement: supp_g3.113.005603_005603SI.pdf [file supp_g3.113.005603_005603SI.pdf]

## Trans-lesion DNA polymerases may be involved in yeast meiosis

Ayelet Arbel-Eden<sup>\* &</sup>, Daphna Joseph-Strauss<sup>\*</sup>, Hagit Masika<sup>\*</sup>, Oxana Printzentel<sup>\*</sup>, Eléanor Rachi<sup>\*</sup> and Giora Simchen<sup>\*,1</sup>

### Author Affiliations:

<sup>\*</sup> Department of Genetics, The Hebrew University of Jerusalem, Jerusalem 91904, Israel

<sup>&</sup> Department of Medical Laboratory Sciences, Hadassah Academic College, Jerusalem 91010, Israel

<sup>1</sup> Corresponding Author:

Giora Simchen

Department of Genetics, The Hebrew University of Jerusalem, Givat-Ram Campus, Jerusalem 91904, Israel

Phone: +972-2-658-5106 Fax: +972-2-658-6975

-mail: [giora.simchen@mail.huji.ac.il](mailto:giora.simchen@mail.huji.ac.il)

**DOI: 10.1534/g3.113.005603**

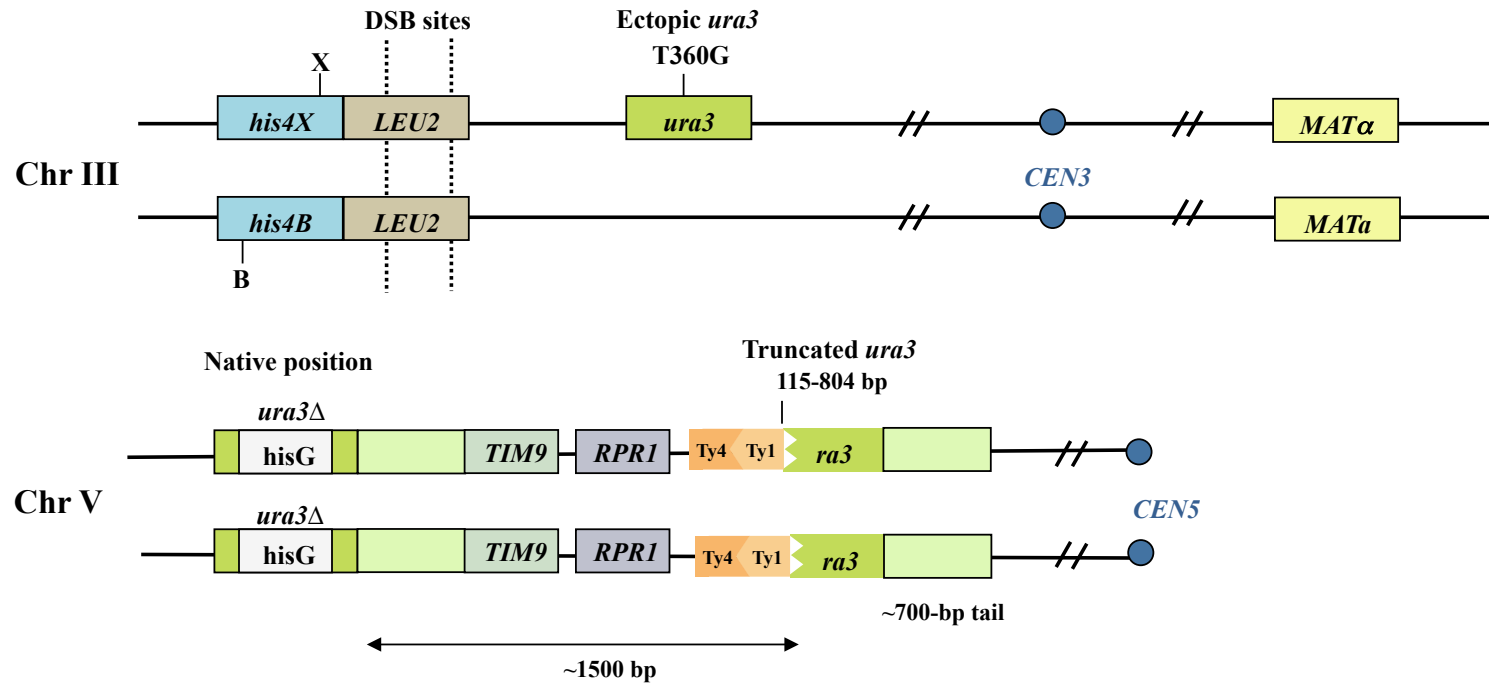

**Figure S1** Chromosomal structure of strains used for tests of allelic recombination and ectopic gene conversion. The diploid strains have undergone deletion of the gene *URA3* on the two copies of chromosome V (*PstI-SmaI* region replaced by *hisG* of Salmonella); in addition, the strains were found to contain, on both chromosomes V, an insert of a truncated copy of the same gene (marked *ra3*), starting at base 115 and ending ~700 bp downstream of *URA3*. These ~1500-bp inserts contain also short sequences of *Ty1* and *Ty4*, and are found ~1500 bp downstream of the original location of *URA3*, namely beyond the genes *TIM9* and *RPR1*. One of the two copies of chromosome III has also an insert of *URA3* near the *his4-X-LEU2* construct (Cao et al 1990), in which T at position 360 was replaced by G (*T360G*), thus making the strain auxotrophic for uracil (*Ura<sup>-</sup>*).

**Table S1** *Saccharomyces cerevisiae* strains used in this study, all of SK1 genetic background

| Strain name                         | Strain # | Genotype                                                                                                                                                                                                                                                             | Source     |
|-------------------------------------|----------|----------------------------------------------------------------------------------------------------------------------------------------------------------------------------------------------------------------------------------------------------------------------|------------|
| WT                                  | DAO23-1  | <i>MAT a/MATa, ho::hisG/ho::hisG, ura3(PstI-SmaI)::hisG/ura3(PstI-SmaI)::hisG, leu2::hisG/leu2::hisG, his4-X::LEU2-ura3-T360G /his4-B::LEU2, TRP1/trp1::hisG</i>                                                                                                     | This study |
| <i>rev3D</i>                        | DAO63    | <i>MATa/MATa, ho::hisG/ho::hisG, ura3(PstI-SmaI)::hisG/ura3(PstI-SmaI)::hisG, leu2::hisG/leu2::hisG, his4-X::LEU2-ura3-T360G /his4-B::LEU2, trp1::hisG/TRP1, lys2/lys2, rev3::kanMX4/rev3::kanMX4</i>                                                                | This study |
| <i>rad30D</i>                       | DAO36    | <i>MATa/MATa, ho::hisG/ho::hisG, ura3(PstI-SmaI)::hisG/ura3(PstI-SmaI)::hisG, leu2::hisG/leu2::hisG, his4-X::LEU2-ura3-T360G /his4-B::LEU2, TRP1/trp1::hisG, rad30::kanMX4/rad30::kanMX4</i>                                                                         | This study |
| <i>rev1D</i>                        | DAO42    | <i>MAT a/MATa, ho::hisG/ho::hisG, ura3(PstI-SmaI)::hisG/ura3(PstI-SmaI)::hisG, leu2::hisG/ leu2::hisG, his4-X::LEU2-ura3-T360G /his4-B::LEU2, trp1::hisG/TRP1, lys2/lys2, rev1::kanMX4/rev1::kanMX4</i>                                                              | This study |
| <i>rev7D</i>                        | DAO29    | <i>MATa/MATa, ho::hisG/ho::hisG, ura3(PstI-SmaI)::hisG/ura3(PstI-SmaI)::hisG, leu2::hisG/leu2::hisG, his4-X::LEU2-ura3-T360G /his4-B::LEU2, TRP1/trp1::hisG, rev7::kanMX4/rev7::kanMX4</i>                                                                           | This study |
| <i>rev1Drad30D</i>                  | DAO49    | <i>MATa/MATa, ho::hisG/ho::hisG, ura3(PstI-SmaI)::hisG/ura3(PstI-SmaI)::hisG, leu2::hisG/ leu2::hisG, his4-X::LEU2-ura3-T360G /his4-B::LEU2, trp1::hisG/TRP1, lys2/lys2, rev1::kanMX4/rev1::kanMX4, rad30::kanMX4/rad30::kanMX4</i>                                  | This study |
| <i>rev3Drad30D</i>                  | DAO80    | <i>MATa/MATa, ho::hisG/ho::hisG, ura3(PstI-SmaI)::hisG/ura3(PstI-SmaI)::hisG, lys2/lys2, TRP1/trp1::hisG, leu2::hisG/ leu2::hisG, his4-X::LEU2-ura3(T360G)/his4-B::LEU2, rev3::kanMX4/rev3::kanMX4, rad30::kanMX4/rad30::kanMX4</i>                                  | This study |
| <i>rev1Drev3D</i>                   | DAO56    | <i>MATa/MATa, ho::hisG/ho::hisG, ura3(PstI-SmaI)::hisG/ura3(PstI-SmaI)::hisG, leu2::hisG/ leu2::hisG, his4-X::LEU2-ura3-T360G /his4-B::LEU2, trp1::hisG/TRP1, lys2/lys2, rev1::kanMX4/rev1::kanMX4, rev3::kanMX4/rev3::kanMX4</i>                                    | This study |
| <i>rev1D rad30D</i><br><i>rev3D</i> | DAO82    | <i>MATa/MATa, ho::hisG/ho::hisG, ura3(PstI-SmaI)::hisG/ura3(PstI-SmaI)::hisG, lys2/lys2, trp1::hisG/trp1::hisG, leu2::hisG/ leu2::hisG, his4-X::LEU2-ura3-T360G /his4-B::LEU2, rev1::kanMX4/rev1::kanMX4, rev3::kanMX4/rev3::kanMX4, rad30::kanMX4/rad30::kanMX4</i> | This study |
| <i>Spo11D</i>                       | DAO62    | <i>MAT a/MATa, ho::hisG/ho::hisG, ura3(PstI-SmaI)::hisG/ura3(PstI-SmaI)::hisG, leu2::hisG/leu2::hisG, his4-X::LEU2-ura3-T360G /his4-B::LEU2, TRP1/trp1::hisG, spo11::kanMX4/spo11::kanMX4</i>                                                                        | This study |
| Rev1-Myc                            | DAO110   | <i>MATa/MATa, ho::hisG/ ho::hisG, ura3(PstI-SmaI)::hisG/ ura3(PstI-SmaI)::hisG his4/his4 lys2/lys2, REV1-13myc:TRP1/ REV1-13myc:TRP1</i>                                                                                                                             | This study |
| Rev3-Myc                            | DAO119   | <i>MATa/MATa, ho::hisG / ho::hisG, ura3(PstI-SmaI)::hisG/ ura3(PstI-SmaI)::hisG his4/his4 lys2/lys2, REV3-13myc::TRP1/ REV3-13myc:TRP1</i>                                                                                                                           | This study |
| Rev7-Myc                            | DAO16-1  | <i>MATa/MATa, ho::hisG/ ho::LYS2 ura3/ura3 ade2/ADE2 his4-X::LEU2-BamH1/his4-B::LEU2 REV7-9myc::TRP1/ REV7-9myc::TRP1</i>                                                                                                                                            | This study |
| Rev1-Myc                            | DAO137   | <i>MATa/MATa, ho::hisG /ho::hisG, ura3(PstI-SmaI)::hisG/ ura3(PstI-SmaI)::hisG lys2/lys2 leu2/leu2 REV1-13myc::TRP1/ REV1-</i>                                                                                                                                       | This study |

|                      |        |                                                                                                                                                                                                        |            |
|----------------------|--------|--------------------------------------------------------------------------------------------------------------------------------------------------------------------------------------------------------|------------|
| Dmc1-HA              |        | <i>13myc::TRP1 DMC1-3HA::kanMX4/DMC1-3HA:: kanMX4</i>                                                                                                                                                  |            |
| Rev1-Myc<br>Rad30-HA | DAO172 | <i>MATa/MATa, ho::hisG/ho::hisG, ura3(PstI-SmaI)::hisG/ ura3(PstI-SmaI)::hisG URA3/URA3 lys2/lys2 his4-X::LEU2/ his4-B::LEU2 REV1-13myc::TRP1/REV1-13myc:TRP1 RAD30-3HA: kanMX4/ RAD30-3HA: kanMX4</i> | This study |
| Rev3-Myc<br>Rad30-HA | DAO178 | <i>MATa/MATa, ho::LYS2 / ho::hisG, his4-X::LEU2/his4-B::LEU2 ura3/ URA3 LYS2/lys2 REV3-13myc::TRP1/REV3-13myc::TRP1 RAD30-3HA::kanMX4/RAD30-3HA::kanMX4</i>                                            | This study |
| Rev1-Myc<br>Tid1-HA  | DAO180 | <i>MATa/MATa, ho::hisG / ho::hisG, ura3(PstI-SmaI)::hisG/ ura3(PstI-SmaI)::hisG lys2/lys2 his4-X::LEU2/his4-B::LEU2 REV1-13myc::TRP1/REV1-13myc::TRP1 TID1-3HA::kanMX4/ TID1-3HA::kanMX4</i>           | This study |
| Rev1-Myc<br>Ime2-HA  | DAO212 | <i>MATa/MATa, ho::LYS2/ho::hisG, ura3(PstI- SmaI)::hisG/ ura3(PstI-SmaI)::hisG trp1::hisG/ trp1::hisG leu2::hisG / leu2::hisG his4-B::LEU2/his4-X::LEU2 REV1-13myc::TRP1/REV1 IME2-3HA::KanMX/IME2</i> | This study |
| <i>ndt80D-a</i>      | 661    | <i>MATa ho::LYS2 lys2 leu2::hisG trp1::hisG ndt80::kanMX4 LexA(op)-LacZ::URA3</i>                                                                                                                      | S. Keeney  |
| <i>ndt80D-a</i>      | 662    | <i>MATa ho::LYS2 lys2 leu2::hisG trp1::hisG ndt80::kanMX4 LexA(op)-LacZ::URA3</i>                                                                                                                      | S. Keeney  |
