# Supplementary material
Source: PubMed Central journal article supplement (PMC3618350)
Supplement: supp_g3.113.005603_TableS1.pdf [file supp_g3.113.005603_TableS1.pdf]

**Table S1** *Saccharomyces cerevisiae* strains used in this study, all of SK1 genetic background

| Strain name           | Strain # | Genotype                                                                                                                                                                                                                                                             | Source     |
|-----------------------|----------|----------------------------------------------------------------------------------------------------------------------------------------------------------------------------------------------------------------------------------------------------------------------|------------|
| WT                    | DAO23-1  | <i>MAT a/MATa, ho::hisG/ho::hisG, ura3(PstI-SmaI)::hisG/ura3(PstI-SmaI)::hisG, leu2::hisG/leu2::hisG, his4-X::LEU2-ura3-T360G /his4-B::LEU2, TRP1/trp1::hisG</i>                                                                                                     | This study |
| rev3D                 | DAO63    | <i>MATa/MATa, ho::hisG/ho::hisG, ura3(PstI-SmaI)::hisG/ura3(PstI-SmaI)::hisG, leu2::hisG/leu2::hisG, his4-X::LEU2-ura3-T360G /his4-B::LEU2, trp1::hisG/TRP1, lys2/lys2, rev3::kanMX4/rev3::kanMX4</i>                                                                | This study |
| rad30D                | DAO36    | <i>MATa/MATa, ho::hisG/ho::hisG, ura3(PstI-SmaI)::hisG/ura3(PstI-SmaI)::hisG, leu2::hisG/leu2::hisG, his4-X::LEU2-ura3-T360G /his4-B::LEU2, TRP1/trp1::hisG, rad30::kanMX4/rad30::kanMX4</i>                                                                         | This study |
| rev1D                 | DAO42    | <i>MAT a/MATa, ho::hisG/ho::hisG, ura3(PstI-SmaI)::hisG/ura3(PstI-SmaI)::hisG, leu2::hisG/ leu2::hisG, his4-X::LEU2-ura3-T360G /his4-B::LEU2, trp1::hisG/TRP1, lys2/lys2, rev1::kanMX4/rev1::kanMX4</i>                                                              | This study |
| rev7D                 | DAO29    | <i>MATa/MATa, ho::hisG/ho::hisG, ura3(PstI-SmaI)::hisG/ura3(PstI-SmaI)::hisG, leu2::hisG/leu2::hisG, his4-X::LEU2-ura3-T360G /his4-B::LEU2, TRP1/trp1::hisG, rev7::kanMX4/rev7::kanMX4</i>                                                                           | This study |
| rev1Drad30D           | DAO49    | <i>MATa/MATa, ho::hisG/ho::hisG, ura3(PstI-SmaI)::hisG/ura3(PstI-SmaI)::hisG, leu2::hisG/ leu2::hisG, his4-X::LEU2-ura3-T360G /his4-B::LEU2, trp1::hisG/TRP1, lys2/lys2, rev1::kanMX4/rev1::kanMX4, rad30::kanMX4/rad30::kanMX4</i>                                  | This study |
| rev3Drad30D           | DAO80    | <i>MATa/MATa, ho::hisG/ho::hisG, ura3(PstI-SmaI)::hisG/ura3(PstI-SmaI)::hisG, lys2/lys2, TRP1/trp1::hisG, leu2::hisG/ leu2::hisG, his4-X::LEU2-ura3(T360G)/his4-B::LEU2, rev3::kanMX4/rev3::kanMX4, rad30::kanMX4/rad30::kanMX4</i>                                  | This study |
| rev1Drev3D            | DAO56    | <i>MATa/MATa, ho::hisG/ho::hisG, ura3(PstI-SmaI)::hisG/ura3(PstI-SmaI)::hisG, leu2::hisG/ leu2::hisG, his4-X::LEU2-ura3-T360G /his4-B::LEU2, trp1::hisG/TRP1, lys2/lys2, rev1::kanMX4/rev1::kanMX4, rev3::kanMX4/rev3::kanMX4</i>                                    | This study |
| rev1D rad30D<br>rev3D | DAO82    | <i>MATa/MATa, ho::hisG/ho::hisG, ura3(PstI-SmaI)::hisG/ura3(PstI-SmaI)::hisG, lys2/lys2, trp1::hisG/trp1::hisG, leu2::hisG/ leu2::hisG, his4-X::LEU2-ura3-T360G /his4-B::LEU2, rev1::kanMX4/rev1::kanMX4, rev3::kanMX4/rev3::kanMX4, rad30::kanMX4/rad30::kanMX4</i> | This study |
| Spo11D                | DAO62    | <i>MAT a/MATa, ho::hisG/ho::hisG, ura3(PstI-SmaI)::hisG/ura3(PstI-SmaI)::hisG, leu2::hisG/leu2::hisG, his4-X::LEU2-ura3-T360G /his4-B::LEU2, TRP1/trp1::hisG, spo11::kanMX4/spo11::kanMX4</i>                                                                        | This study |
| Rev1-Myc              | DAO110   | <i>MATa/MATa, ho::hisG/ ho::hisG, ura3(PstI-SmaI)::hisG/ ura3(PstI-SmaI)::hisG his4/his4 lys2/lys2, REV1-13myc:TRP1/ REV1-13myc:TRP1</i>                                                                                                                             | This study |
| Rev3-Myc              | DAO119   | <i>MATa/MATa, ho::hisG / ho::hisG, ura3(PstI-SmaI)::hisG/ ura3(PstI-SmaI)::hisG his4/his4 lys2/lys2, REV3-13myc::TRP1/ REV3-13myc:TRP1</i>                                                                                                                           | This study |
| Rev7-Myc              | DAO16-1  | <i>MATa/MATa, ho::hisG/ ho::LYS2 ura3/ura3 ade2/ADE2 his4-X::LEU2-BamH1/his4-B::LEU2 REV7-9myc::TRP1/ REV7-9myc::TRP1</i>                                                                                                                                            | This study |
| Rev1-Myc              | DAO137   | <i>MATa/MATa, ho::hisG /ho::hisG, ura3(PstI-SmaI)::hisG/ ura3(PstI-SmaI)::hisG lys2/lys2 leu2/leu2 REV1-13myc::TRP1/ REV1-</i>                                                                                                                                       | This study |

|                      |        |                                                                                                                                                                                                        |            |
|----------------------|--------|--------------------------------------------------------------------------------------------------------------------------------------------------------------------------------------------------------|------------|
| Dmc1-HA              |        | <i>13myc::TRP1 DMC1-3HA::kanMX4/DMC1-3HA:: kanMX4</i>                                                                                                                                                  |            |
| Rev1-Myc<br>Rad30-HA | DAO172 | <i>MATa/MATa, ho::hisG/ho::hisG, ura3(PstI-SmaI)::hisG/ ura3(PstI-SmaI)::hisG URA3/URA3 lys2/lys2 his4-X::LEU2/ his4-B::LEU2 REV1-13myc::TRP1/REV1-13myc:TRP1 RAD30-3HA: kanMX4/ RAD30-3HA: kanMX4</i> | This study |
| Rev3-Myc<br>Rad30-HA | DAO178 | <i>MATa/MATa, ho::LYS2 / ho::hisG, his4-X::LEU2/his4-B::LEU2 ura3/ URA3 LYS2/lys2 REV3-13myc::TRP1/REV3-13myc::TRP1 RAD30-3HA::kanMX4/RAD30-3HA::kanMX4</i>                                            | This study |
| Rev1-Myc<br>Tid1-HA  | DAO180 | <i>MATa/MATa, ho::hisG / ho::hisG, ura3(PstI-SmaI)::hisG/ ura3(PstI-SmaI)::hisG lys2/lys2 his4-X::LEU2/his4-B::LEU2 REV1-13myc::TRP1/REV1-13myc::TRP1 TID1-3HA::kanMX4/ TID1-3HA::kanMX4</i>           | This study |
| Rev1-Myc<br>Ime2-HA  | DAO212 | <i>MATa/MATa, ho::LYS2/ho::hisG, ura3(PstI-SmaI)::hisG/ ura3(PstI-SmaI)::hisG trp1::hisG/ trp1::hisG leu2::hisG / leu2::hisG his4-B::LEU2/his4-X::LEU2 REV1-13myc::TRP1/REV1 IME2-3HA::KanMX/IME2</i>  | This study |
| <i>ndt80D-a</i>      | 661    | <i>MATa ho::LYS2 lys2 leu2::hisG trp1::hisG ndt80::kanMX4 LexA(op)-LacZ::URA3</i>                                                                                                                      | S. Keeney  |
| <i>ndt80D-a</i>      | 662    | <i>MATa ho::LYS2 lys2 leu2::hisG trp1::hisG ndt80::kanMX4 LexA(op)-LacZ::URA3</i>                                                                                                                      | S. Keeney  |
